# Supplementary material
Source: PubMed Central journal article supplement (PMC5508552)

Suppl. Fig. 1

**a**

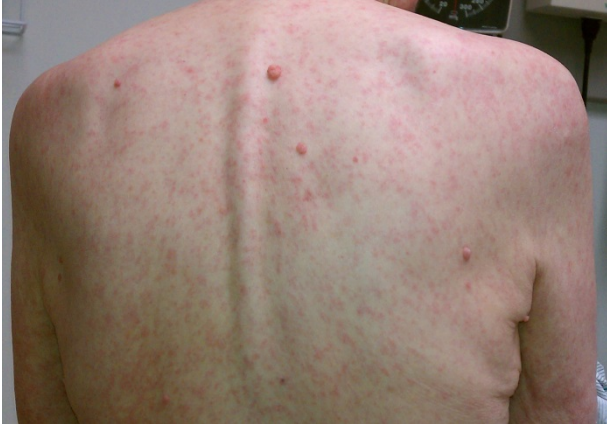

**b**

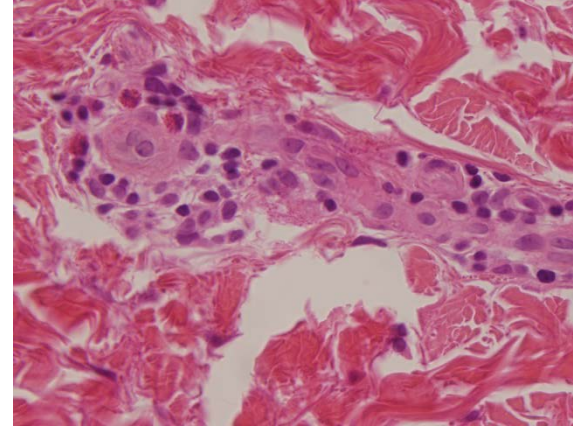

Supplement: NIHMS873123-supplement-Supplemental_Figure_1.pdf [file NIHMS873123-supplement-Supplemental_Figure_1.pdf]
